# Supplementary material for: Evolutionary dynamics of GII.17 norovirus
Source: PeerJ. 2018 Feb 1;6:e4333. doi: 10.7717/peerj.4333 (PMC5797681; doi:10.7717/peerj.4333)
Supplement: Table S1 [file peerj-06-4333-s002.xlsx]

## Sheet: GII.17
Table S1. Norovirus GII.17 download from Genbank
Strain	Location	Collection date
KT285173/Australia/2014	Australia	2014.5
KR858308/Beijing/2015	Beijing	2015.2
JN699043/French_Guiana/1978	French_Guiana	1978.7
KC597139/French_Guiana/1978	French_Guiana	1978.7
KP994318/Guangdong/2014	Guangdong	2014.12
KP994317/Guangdong/2015	Guangdong	2015.1
KR020503/Guangzhou/2014	Guangzhou	2014.12
KT149168/Guangzhou/2014	Guangzhou	2014.12
KT149169/Guangzhou/2014	Guangzhou	2014.12
KT970369/Guangzhou/2014	Guangzhou	2014.12
KT970370/Guangzhou/2014	Guangzhou	2014.12
KT149170/Guangzhou/2015	Guangzhou	2015.1
KT149171/Guangzhou/2015	Guangzhou	2015.1
KT149172/Guangzhou/2015	Guangzhou	2015.1
KT149173/Guangzhou/2015	Guangzhou	2015.1
KT149174/Guangzhou/2015	Guangzhou	2015.1
KT149175/Guangzhou/2015	Guangzhou	2015.1
KT149176/Guangzhou/2015	Guangzhou	2015.3
KT970371/Guangzhou/2015	Guangzhou	2015.1
KT970372/Guangzhou/2015	Guangzhou	2015.1
KT970373/Guangzhou/2015	Guangzhou	2015.1
KT970374/Guangzhou/2015	Guangzhou	2015.1
KT970375/Guangzhou/2015	Guangzhou	2015.1
KT970376/Guangzhou/2015	Guangzhou	2015.1
KT970377/Guangzhou/2015	Guangzhou	2015.3
KT992785/Henan/2015	Henan	2015.3
KT992786/Henan/2015	Henan	2015.3
KT992787/Henan/2015	Henan	2015.3
KT992788/Henan/2015	Henan	2015.3
KT992789/Henan/2015	Henan	2015.3
KT992790/Henan/2015	Henan	2015.3
KP698928/Hong_Kong/2014	Hong_Kong	2014.12
KP698929/Hong_Kong/2014	Hong_Kong	2014.12
KP902563/Hong_Kong/2014	Hong_Kong	2014.3
KP902564/Hong_Kong/2014	Hong_Kong	2014.4
KP902565/Hong_Kong/2014	Hong_Kong	2014.8
KP902566/Hong_Kong/2014	Hong_Kong	2014.9
KP902567/Hong_Kong/2014	Hong_Kong	2014.11
KP902568/Hong_Kong/2014	Hong_Kong	2014.11
KP902569/Hong_Kong/2014	Hong_Kong	2014.11
KP902570/Hong_Kong/2014	Hong_Kong	2014.12
KP902571/Hong_Kong/2014	Hong_Kong	2014.12
KP902572/Hong_Kong/2014	Hong_Kong	2014.12
KP902573/Hong_Kong/2014	Hong_Kong	2014.12
KP902574/Hong_Kong/2014	Hong_Kong	2014.12
KP902575/Hong_Kong/2014	Hong_Kong	2014.12
KP902576/Hong_Kong/2014	Hong_Kong	2014.12
KP902577/Hong_Kong/2014	Hong_Kong	2014.12
KP902578/Hong_Kong/2014	Hong_Kong	2014.12
KP998539/Hong_Kong/2014	Hong_Kong	2014.12
KT315669/Hong_Kong/2014	Hong_Kong	2014-2015
KT315670/Hong_Kong/2014	Hong_Kong	2014-2015
KT315671/Hong_Kong/2014	Hong_Kong	2014-2015
KT315672/Hong_Kong/2014	Hong_Kong	2014-2015
KT315673/Hong_Kong/2014	Hong_Kong	2014-2015
KT326180/Hong_Kong/2014	Hong_Kong	2014-2015
KT780394/Hong_Kong/2014	Hong_Kong	2014-2015
KT780395/Hong_Kong/2014	Hong_Kong	2014-2015
KT780396/Hong_Kong/2014	Hong_Kong	2014-2015
KT780397/Hong_Kong/2014	Hong_Kong	2014-2015
KT780398/Hong_Kong/2014	Hong_Kong	2014-2015
KT780399/Hong_Kong/2014	Hong_Kong	2014-2015
KP698930/Hong_Kong/2015	Hong_Kong	2015.1
KP698931/Hong_Kong/2015	Hong_Kong	2015.1
KP902579/Hong_Kong/2015	Hong_Kong	2015.1
KP902580/Hong_Kong/2015	Hong_Kong	2015.1
KP902581/Hong_Kong/2015	Hong_Kong	2015.1
KP902582/Hong_Kong/2015	Hong_Kong	2015.1
KP902583/Hong_Kong/2015	Hong_Kong	2015.1
KP902584/Hong_Kong/2015	Hong_Kong	2015.1
KP902585/Hong_Kong/2015	Hong_Kong	2015.1
KP902586/Hong_Kong/2015	Hong_Kong	2015.1
KP902587/Hong_Kong/2015	Hong_Kong	2015.1
KP902588/Hong_Kong/2015	Hong_Kong	2015.1
KP902589/Hong_Kong/2015	Hong_Kong	2015.1
KP902590/Hong_Kong/2015	Hong_Kong	2015.1
KT315674/Hong_Kong/2015	Hong_Kong	2014-2015
KT315677/Hong_Kong/2015	Hong_Kong	2014-2015
KT315678/Hong_Kong/2015	Hong_Kong	2014-2015
KT315679/Hong_Kong/2015	Hong_Kong	2014-2015
KT315680/Hong_Kong/2015	Hong_Kong	2014-2015
KT315681/Hong_Kong/2015	Hong_Kong	2014-2015
KT315682/Hong_Kong/2015	Hong_Kong	2014-2015
KT315683/Hong_Kong/2015	Hong_Kong	2014-2015
KT315684/Hong_Kong/2015	Hong_Kong	2014-2015
KT315686/Hong_Kong/2015	Hong_Kong	2014-2015
KT315687/Hong_Kong/2015	Hong_Kong	2014-2015
KT315688/Hong_Kong/2015	Hong_Kong	2014-2015
KT315689/Hong_Kong/2015	Hong_Kong	2014-2015
KT315690/Hong_Kong/2015	Hong_Kong	2014-2015
KT315691/Hong_Kong/2015	Hong_Kong	2014-2015
KT315692/Hong_Kong/2015	Hong_Kong	2014-2015
KT315694/Hong_Kong/2015	Hong_Kong	2014-2015
KT315695/Hong_Kong/2015	Hong_Kong	2014-2015
KT315697/Hong_Kong/2015	Hong_Kong	2014-2015
KT315698/Hong_Kong/2015	Hong_Kong	2014-2015
KT315699/Hong_Kong/2015	Hong_Kong	2014-2015
KT315700/Hong_Kong/2015	Hong_Kong	2014-2015
KT315702/Hong_Kong/2015	Hong_Kong	2014-2015
KT315703/Hong_Kong/2015	Hong_Kong	2014-2015
KT315705/Hong_Kong/2015	Hong_Kong	2014-2015
KT315706/Hong_Kong/2015	Hong_Kong	2014-2015
KT315707/Hong_Kong/2015	Hong_Kong	2014-2015
KT315708/Hong_Kong/2015	Hong_Kong	2014-2015
KT315709/Hong_Kong/2015	Hong_Kong	2014-2015
KT315710/Hong_Kong/2015	Hong_Kong	2014-2015
KT315712/Hong_Kong/2015	Hong_Kong	2014-2015
KT315713/Hong_Kong/2015	Hong_Kong	2014-2015
KT315714/Hong_Kong/2015	Hong_Kong	2014-2015
KT315716/Hong_Kong/2015	Hong_Kong	2014-2015
KT315717/Hong_Kong/2015	Hong_Kong	2014-2015
KT315718/Hong_Kong/2015	Hong_Kong	2014-2015
KT315719/Hong_Kong/2015	Hong_Kong	2014-2015
KT326181/Hong_Kong/2015	Hong_Kong	2014-2015
KT326182/Hong_Kong/2015	Hong_Kong	2014-2015
KT346358/Hong_Kong/2015	Hong_Kong	2014-2015
KT589391/Hong_Kong/2015	Hong_Kong	2014-2015
KT780400/Hong_Kong/2015	Hong_Kong	2014-2015
KT780401/Hong_Kong/2015	Hong_Kong	2014-2015
KT780402/Hong_Kong/2015	Hong_Kong	2014-2015
KT780403/Hong_Kong/2015	Hong_Kong	2014-2015
KT780404/Hong_Kong/2015	Hong_Kong	2014-2015
KT780405/Hong_Kong/2015	Hong_Kong	2014-2015
KT780406/Hong_Kong/2015	Hong_Kong	2014-2015
KT780407/Hong_Kong/2015	Hong_Kong	2014-2015
KT780408/Hong_Kong/2015	Hong_Kong	2014-2015
KT780409/Hong_Kong/2015	Hong_Kong	2014-2015
KT780410/Hong_Kong/2015	Hong_Kong	2014-2015
KT780411/Hong_Kong/2015	Hong_Kong	2014-2015
KT780412/Hong_Kong/2015	Hong_Kong	2014-2015
KT780413/Hong_Kong/2015	Hong_Kong	2014-2015
KT780414/Hong_Kong/2015	Hong_Kong	2014-2015
KT780415/Hong_Kong/2015	Hong_Kong	2014-2015
KT780416/Hong_Kong/2015	Hong_Kong	2014-2015
KT346356/Italy/2015	Italy	2015
KJ196286/Japan/2002	Japan	2002
LC043167/Japan/2013	Japan	2013.4
LC043168/Japan/2013	Japan	2013.7
AB983218/Japan/2014	Japan	2014.3
LC043139/Japan/2014	Japan	2014.8
LC043305/Japan/2014	Japan	2014.8
LC037415/Japan/2015	Japan	2014-2015
LC101820/Japan/2015	Japan	2014-2015
KR270442/Jiangsu/2015	Jiangsu	2015.3
KR270443/Jiangsu/2015	Jiangsu	2015.3
KR270444/Jiangsu/2015	Jiangsu	2015.3
KR270445/Jiangsu/2015	Jiangsu	2015.3
KR270446/Jiangsu/2015	Jiangsu	2015.3
KR270447/Jiangsu/2015	Jiangsu	2015.3
KR270449/Jiangsu/2015	Jiangsu	2015.3
JF970609/Mexico/2007	Mexico	2007.7
KP864103/Shanghai/2014	Shanghai	2014.11
KP864104/Shanghai/2014	Shanghai	2014.12
KT380915/Shanghai/2014	Shanghai	2014-2015
KP864102/Shanghai/2015	Shanghai	2015.1
KT864684/South_Korea/2015	South_Korea	2015.3
KT864685/South_Korea/2015	South_Korea	2015.3
KT864686/South_Korea/2015	South_Korea	2015.3
KT864687/South_Korea/2015	South_Korea	2015.3
KU687013/South_Korea/2015	South_Korea	2015.3
KU687015/South_Korea/2015	South_Korea	2015.3
KU687016/South_Korea/2015	South_Korea	2015.3
GQ266696/Switzerland/2008	Switzerland	2008.2
GQ266697/Switzerland/2009	Switzerland	2009.3
KJ156329/Taiwan/2013	Taiwan	2013.10
KR154230/Taiwan/2015	Taiwan	2015.1
KR154231/Taiwan/2015	Taiwan	2015.2
AY502009/USA/2002	USA	2002
DQ438972/USA/2005	USA	2005.9
KR083017/USA/2014	USA	2014.11
KT253245/Zhuhai/2015	Zhuhai	2015
Note: 2014-2015 meant the winter of 2014-2015, which was abtained from the published papers.
