# Supplementary material for: Evolutionary dynamics of GII.17 norovirus
Source: PeerJ. 2018 Feb 1;6:e4333. doi: 10.7717/peerj.4333 (PMC5797681; doi:10.7717/peerj.4333)
Supplement: Table S2 — The best fitting model is ranked 1 (bold). BF, Bayes factors model selection; HM, Harmonic mean model selection; AICM, the Akaike information content model selection. [file peerj-06-4333-s003.xlsx]

## Sheet: Sheet1
	Table S2. Model selection based on marginal likelihood estimates.
	Clock Model	BF	Ranking	HM	Ranking	AICM	Ranking
	Strict clock model	-8422	3	-8444	3	17204	2
	Uncorrelated exponential relaxed clock model	-8372	1	-8399	1	17164	1
	Uncorrelated lognormal relaxed clock model	-8386	2	-8413	2	17217	3
	Note: Thes best fitting model is ranked 1 (bold). BF=Bayes factors model selection, HM=Harmonic mean model selection, AICM=the Akaike information content model selection.
